# Supplementary material
Source: PubMed Central journal article supplement (PMC4163006)
Supplement: NIHMS600953-supplement-01.pdf [file NIHMS600953-supplement-01.pdf]

| <b>Online Table I: Acute Asthma Intensity Research Score (AAIRS) Components</b> |                 |                    |                            |                                             |
|---------------------------------------------------------------------------------|-----------------|--------------------|----------------------------|---------------------------------------------|
| Component                                                                       | Component Value |                    |                            |                                             |
|                                                                                 | 0               | 1                  | 2                          | 3                                           |
| Retractions                                                                     |                 |                    |                            |                                             |
| Sternocleidomastoid                                                             | No              |                    | Yes                        |                                             |
| Intercostal                                                                     | No              |                    | Yes                        |                                             |
| Subcostal                                                                       | No              |                    | Yes                        |                                             |
| Air Entry                                                                       | Normal          | Decreased at bases | Widespread decrease        | Absent or minimal                           |
| Wheezing                                                                        | Absent          | Expiratory         | Inspiratory and expiratory | Audible without stethoscope or silent chest |
| SpO <sub>2</sub>                                                                | >95%            | 92-94%             | <92%                       |                                             |
| Expiratory Phase                                                                | Normal          | Prolonged          | Severely prolonged         |                                             |

Severity categories by AAIRS: mild = 1 – 5; moderate = 6 – 11; severe = 12 – 16

| <b>Online Table II: Demographic and Asthma Severity Variables of participants ages 5 – 17 years with acute asthma exacerbations</b> |                               |                   |                             |
|-------------------------------------------------------------------------------------------------------------------------------------|-------------------------------|-------------------|-----------------------------|
| Demographic Variable                                                                                                                | FeNO measurement availability |                   | Overall cohort<br>(n = 806) |
|                                                                                                                                     | Yes (n = 436)                 | No (n = 370)      |                             |
| Age (years)*                                                                                                                        | 9.0 [7.0, 12.0]               | 7.0 [5.0, 9.0]    | 8.0 [6.0,11.0]              |
| Sex                                                                                                                                 |                               |                   |                             |
| Male, n (%)                                                                                                                         | 261 (60)                      | 234 (63)          | 495 (61)                    |
| Race, n (%)                                                                                                                         |                               |                   |                             |
| African-American                                                                                                                    | 244 (56)                      | 218 (59)          | 462 (57)                    |
| White                                                                                                                               | 191 (44)                      | 146 (39)          | 337 (42)                    |
| Asian                                                                                                                               | 1 (0)                         | 5 (1)             | 6 (1)                       |
| American Indian/Alaskan                                                                                                             | 0 (0)                         | 1 (0)             | 1 (0)                       |
| Hispanic ethnicity, n (%)                                                                                                           | 28 (6)                        | 30 (8)            | 58 (7)                      |
| Body Mass Index *                                                                                                                   | 18.8 [16.2, 22.5]             | 16.7 [15.3, 19.8] | 17.9 [15.5,21.8]            |
| Type of Insurance, n (%)                                                                                                            |                               |                   |                             |
| Commercial                                                                                                                          | 174 (40)                      | 132 (36)          | 306 (38)                    |
| TennCare/Medicaid                                                                                                                   | 254 (58)                      | 233 (63)          | 487 (60)                    |
| None                                                                                                                                | 8 (2)                         | 5 (1)             | 13 (2)                      |
| 2 <sup>nd</sup> hand smoke exposure in primary residence, n (%)                                                                     | 173 (40)                      | 128 (35)          | 301 (37)                    |
| Participant smokes cigarettes, n (%)                                                                                                | 6 (1)                         | 1 (0)             | 7 (1)                       |
| Current upper respiratory infection symptoms, n (%)                                                                                 | 156 (36)                      | 156 (42)          | 312 (39)                    |
| AAIRS *                                                                                                                             | 3 [1, 6]                      | 6 [3, 9]          | 5 [2,8]                     |
| % predicted FEV <sub>1</sub> (n=463)* **                                                                                            | 56 [40, 76]                   | 42 [32, 61]       | 51 [36,73]                  |
|                                                                                                                                     |                               |                   |                             |
| <b>Asthma Severity Variable</b>                                                                                                     |                               |                   |                             |
| Medications in Use, n (%)                                                                                                           |                               |                   |                             |
| Inhaled albuterol                                                                                                                   | 356 (82)                      | 310 (84)          | 666 (83)                    |
| Inhaled corticosteroid                                                                                                              | 181 (42)                      | 162 (44)          | 343 (43)                    |
| Acute course of systemic corticosteroid                                                                                             | 104 (24)                      | 88 (24)           | 192 (24)                    |
| Leukotriene receptor antagonist                                                                                                     | 94 (25)                       | 128 (29)          | 222 (28)                    |
| Chronic systemic corticosteroid                                                                                                     | 17 (4)                        | 6 (2)             | 23 (3)                      |
| GINA control variables, n (%)                                                                                                       |                               |                   |                             |
| Daytime symptoms > 2 times per week                                                                                                 | 206 (47)                      | 171 (46)          | 377 (47)                    |
| Nighttime symptoms ≥ once per week                                                                                                  | 239 (55)                      | 197 (53)          | 436 (54)                    |
| Limitation of activity                                                                                                              | 226 (52)                      | 165 (45)          | 391 (49)                    |
| Rescue treatment ≥ 2 times per week                                                                                                 | 207 (47)                      | 158 (43)          | 365 (45)                    |
| History of intensive care admission, n (%)                                                                                          | 88 (20)                       | 65 (18)           | 153 (19)                    |

\*median [interquartile range]

\*\*463 participants (60%) provided ATS-criteria spirometry for % predicted FEV<sub>1</sub>
